# Supplementary material for: Evaluation of genetic components in traits related to superovulation, in vitro fertilization, and embryo transfer in Holstein cattle
Source: Elsevier journal article supplement (doi:10.3168/jds.2016-11907), 2017-01-26

**Supplementary Figure S1.** Manhattan plot of standardized SNP effects (absolute value of SNP effect / standard deviation of SNP variance) associated with total structures recovered in the superovulation dataset with logarithmic transformation.

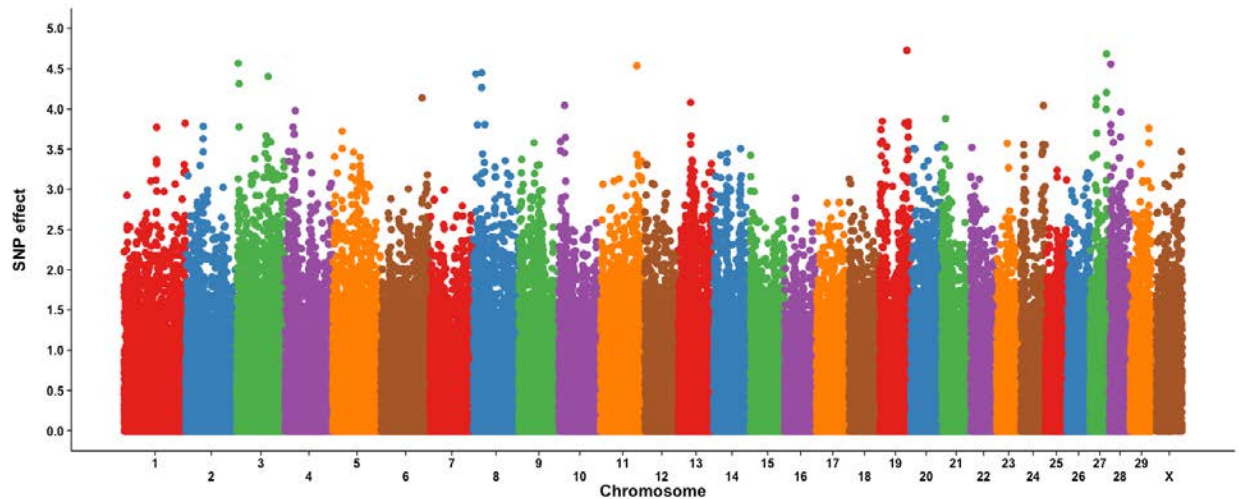

**Supplementary Figure S2.** Manhattan plot of standardized SNP effects (absolute value of SNP effect / standard deviation of SNP variance) associated with total structures recovered in the superovulation dataset with Anscombe transformation.

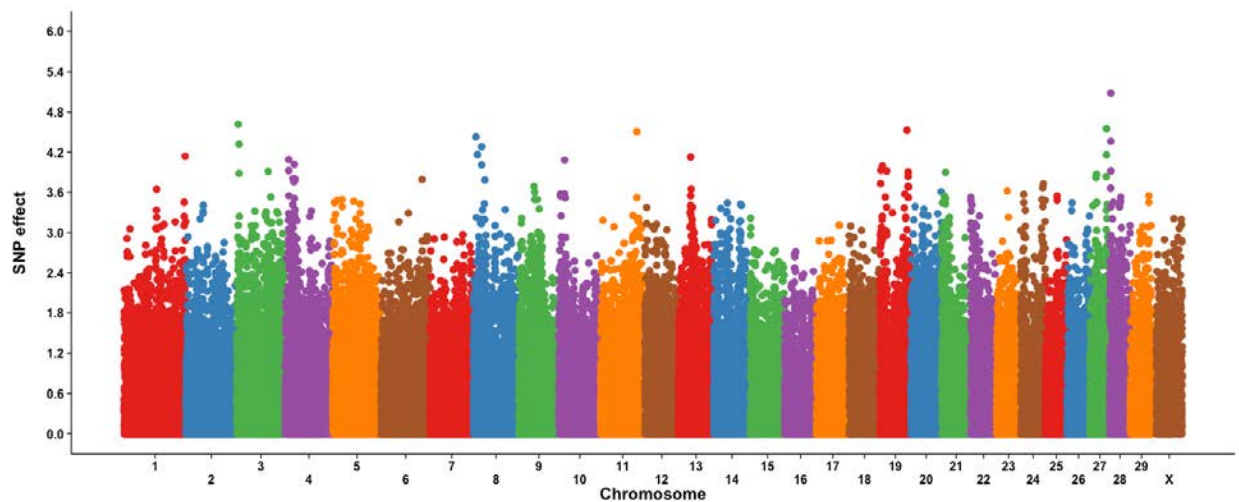

**Supplementary Figure S3.** Manhattan plot of standardized SNP effects (absolute value of SNP effect / standard deviation of SNP variance) associated with number of good embryos in the superovulation dataset with logarithmic transformation.

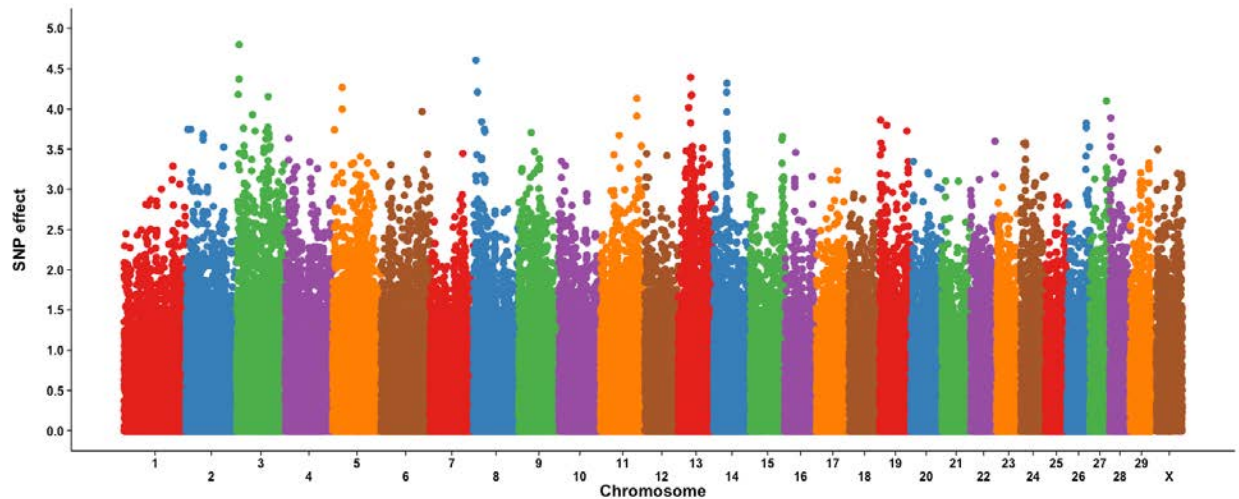

**Supplementary Figure S4.** Manhattan plot of standardized SNP effects (absolute value of SNP effect / standard deviation of SNP variance) associated with number of good embryos in the superovulation dataset with Anscombe transformation.

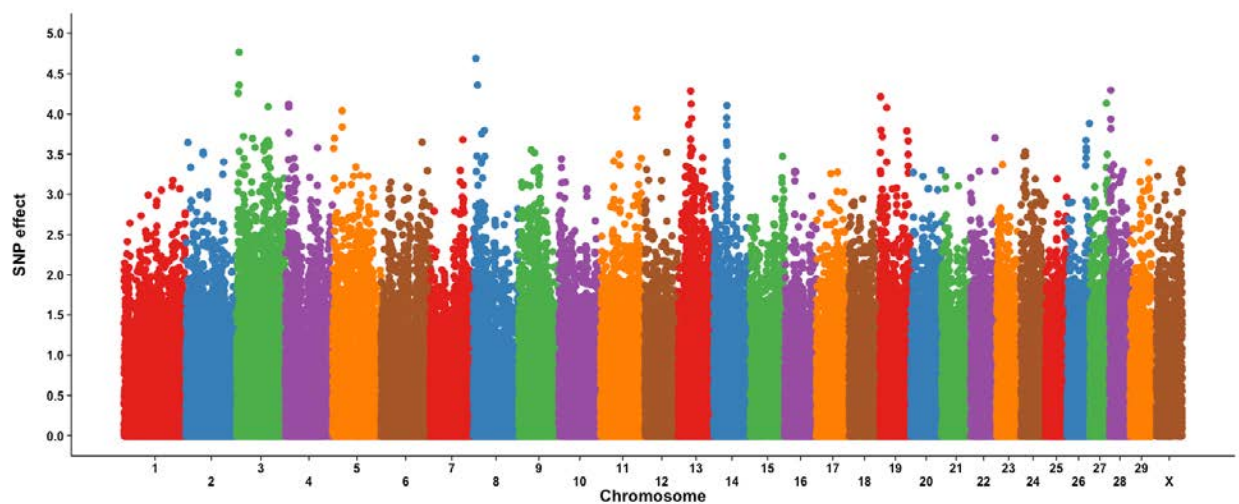

Supplement: mmc1 [file mmc1.pdf]
